1 Living with rheumatic fever and rheumatic heart disease in Victoria, Australia: a  
2 qualitative study

3 Jane Oliver,<sup>1,2\*</sup> Loudeen Fualautoalasi-Lam,<sup>1</sup> Angeline Ferdinand,<sup>3</sup> Ramona Tiatia,<sup>4</sup>

4 Bryn Jones,<sup>1</sup> Daniel Engelman,<sup>1</sup> Katherine B. Gibney,<sup>2^</sup> Andrew C. Steer<sup>1^</sup>

5

6 \*Corresponding author

7 ^ Joint senior authors

8 792 Elizabeth St, Melbourne, Victoria, Australia 3000

9 [jane.oliver@unimelb.edu.au](mailto:jane.oliver@unimelb.edu.au)

10

11 <sup>1</sup> Murdoch Children's Research Institute, The Royal Children's Hospital, Parkville, Victoria, Australia 3052

12 <sup>2</sup> Department of Infectious Diseases, University of Melbourne, at the Peter Doherty Institute for Infection and  
13 Immunity, Victoria, 3000, Australia

14 <sup>3</sup> Centre for Health Policy, Melbourne School of Population and Global Health, University of Melbourne Victoria,  
15 3000, Australia.

16 <sup>4</sup> WellStop Southern, Lower Hutt, 5010, New Zealand

17

18

## 19 **Abstract**

### 20 *Background*

21 In Victoria, Australia, children with Pacific Islander ('Pacific') ethnicities are overrepresented in acute  
22 rheumatic fever (ARF) and rheumatic heart disease (RHD). In June 2023, a Victorian RHD control  
23 program was initiated. To inform public health and clinical practice, we described young Pacific  
24 patients' and their caregivers' understandings and experiences of ARF/RHD, and identified possible  
25 ways to improve the delivery of clinical care.

### 26 *Methods*

27 We established a project reference group including local Pacific people to guide this research. Pacific  
28 patients who attended an ARF/RHD clinic at The Royal Children's Hospital, Melbourne, were invited  
29 to participate, as were their caregivers. A Samoan researcher conducted qualitative 'talanoa'  
30 (conversational) interviews with patients and caregivers. A second researcher conducted semi-  
31 structured interviews with treating clinicians and other stakeholders. Interview transcripts  
32 underwent thematic analysis guided by the Tuilaepa Youth Mentoring Services Pacific Youth  
33 Wellbeing Framework.

### 34 *Results*

35 We interviewed 27 participants. This included nine patients and nine caregivers, all of whom were  
36 Samoan. These 18 participants expressed a desire to learn more about ARF/RHD and connect with  
37 other affected people. While some shared their experiences of having well-liked and trusted  
38 healthcare providers, patients often struggled to have two-way clinical conversations. The need to  
39 support clinicians working with high-risk populations to improve their awareness of ARF was  
40 identified. Receiving treatment on time was a top priority for affected families, despite injection pain,  
41 inconvenience and financial costs. The need to support continuity of care for young adult patients  
42 was raised by participants.

## 43 Conclusions

44 Pacific people living with ARF/RHD and their families require additional support to receive high  
45 quality management in Victoria. Introducing a patient register and a specialist RHD nurse would  
46 enhance access to treatment, as would removing cost barriers, improving clinical awareness of  
47 ARF/RHD and creating Victoria-specific patient resources.

48

49

## 50 Introduction

51 Acute rheumatic fever (ARF) is an autoimmune response that occurs in a minority of cases following  
52 an untreated *Streptococcus pyogenes* infection. Once ARF occurs, regular antibiotic treatment  
53 ('secondary prophylaxis') is recommended to prevent recurrences.<sup>1</sup> ARF may lead to permanent  
54 cardiac damage termed 'rheumatic heart disease' (RHD). ARF typically presents in childhood, with  
55 incidence highest among those aged 5–14 years. RHD, which often presents in early-middle  
56 adulthood,<sup>1</sup> is a major cause of preventable morbidity and early death in low-middle income  
57 countries. In 2015, 319,400 deaths were attributed to RHD globally, with the highest burden in  
58 Oceania, South Asia, and central sub-Saharan Africa.<sup>2</sup> ARF was once common throughout the world,  
59 but as living conditions, home crowding and access to antibiotics improved from the 1970s,<sup>3</sup> ARF  
60 became recognised as a disease of social injustice.<sup>1,4</sup> Now rare in most high-income countries, ARF  
61 persists as a public health problem in low-middle income countries and some First Nations  
62 populations in high-income countries. Polynesian, Micronesian or Melanesian ('Pacific peoples'),  
63 Māori, and Aboriginal and Torres Strait Islander children experience among the highest ARF  
64 incidences in the world.<sup>1,4</sup>

65 Australian clinical guidelines recommend secondary prophylaxis via deep intramuscular injection of  
66 benzathine penicillin G (BPG) every 28 days for at least five years following the initial ARF

67 occurrence.<sup>5</sup> The World Health Organization recommends RHD control programs be implemented in  
68 areas with a significant disease burden, with best-practice patient management facilitated through  
69 patient registers.<sup>6</sup> In Australia, secondary prophylaxis is currently coordinated by RHD registers in  
70 many, but not all, jurisdictions (the Northern Territory, Queensland, New South Wales (NSW), South  
71 Australia and Western Australia all have registers).<sup>5,7</sup> The Australian ARF/RHD guidelines recognise  
72 that Pacific people who live in metropolitan households and are affected by crowding and/or lower  
73 socioeconomic status have a high risk of ARF.<sup>5</sup> In NSW, of the 87 cases added to the RHD register  
74 from October 2015 to December 2017, 37 (43%) were Pacific and 35 (40%) were Indigenous.<sup>8</sup> In  
75 2016, <1% of the NSW population were Pacific and <3% were Indigenous.<sup>9</sup> In Victoria, ARF and RHD  
76 were made notifiable to the state Department of Health on 31 July 2023. There is no centralised RHD  
77 register in Victoria. From 2010–2019, 108 Victorian resident children and adolescents were admitted  
78 to either of the state’s two tertiary paediatric hospitals with ARF/RHD. Of these, 49 (45%) were  
79 identified from hospital records as having Pacific ethnic backgrounds (including 36 Samoan children),  
80 and 11 (10%) were Indigenous. This equates to an annual incidence of 32 ARF/RHD cases per 100,000  
81 Pacific children aged 5–14 years, and 4 per 100,000 Indigenous children in this age group, compared  
82 to an overall annual incidence of 0.8 per 100,000 children aged 5–14 years in Victoria.<sup>10</sup>

83 As of the 2016 census, 62,613 Victorian residents indicated they had Pacific/Māori ancestry, of  
84 whom over 90% resided in metropolitan Melbourne.<sup>11</sup> Pacific people living in Victoria experience  
85 worse educational and employment outcomes than the Victorian average<sup>11-13</sup>, with limited English  
86 language fluency reported among 20% of those aged >65 years and 3% of young adults.<sup>11</sup>

87

88 The Fonofale Model of Health provides a definition of how and what Pacific people consider to be  
89 the major determinants of their health.<sup>14</sup> The Tuilaepa Youth Mentoring Services (TYMS) Pacific  
90 Youth Wellbeing Framework is a strengths-based adaption of the Fonofale Model specific to youth  
91 wellbeing.<sup>14,15</sup> Family is positioned as the foundation for health, and wellbeing includes body, mind,  
92 spirit and culture, taking into account broader contexts such as time and environment (Figure 1).<sup>16</sup>

93

94 **Figure 1. The Tuilaepa Youth Mentoring Services Pacific Youth Wellbeing Framework<sup>15</sup>**

95

96 Several reports have described Victorian Pacific communities as being ‘forgotten’ by government  
97 and mainstream society.<sup>17-19</sup> Reported barriers to healthcare include a tendency to avoid seeking  
98 conventional medical treatment unless seriously unwell,<sup>18,20</sup> stigmatisation of illness,<sup>13,20,21</sup> low  
99 health literacy and racism in healthcare settings.<sup>13,19,21</sup> A number of reports have considered unmet  
100 needs in the Victorian Pacific community, and strongly recommend removing barriers to welfare  
101 supports and education, including by expanding services available to Pacific youth.<sup>12,18,19,22</sup>

102

103 A New Zealand analysis included 38 Māori and Pacific participants with ARF/RHD and identified  
104 barriers to accessing healthcare, including secondary prophylaxis. Key barriers were socioeconomic  
105 deprivation, racism in healthcare settings and age-inappropriate healthcare models. The authors  
106 identified particular service models and approaches taken by healthcare providers that helped  
107 improve BPG adherence and create positive experiences for families. The key facilitators for  
108 effective management of ARF they identified were: flexible, community-based models of care; good  
109 communication and rapport between patients, families and health professionals; and effective  
110 information-sharing and referral pathways between paediatric and adult services and between  
111 jurisdictions.<sup>23</sup> Despite being substantially over-represented in the Victorian burden of ARF/RHD,  
112 little has been documented of the patient journey for young Pacific people with these conditions in  
113 Victoria.

114 To inform public health and clinical practice in Victoria, we described young Pacific patients’ and  
115 their caregivers’ understandings and experiences of ARF/RHD, and identified possible ways to  
116 improve the delivery of clinical care.

117

## 118 **Methods**

119 This study is presented using the Consolidated Criteria for Reporting Qualitative Research (COREQ).<sup>24</sup>  
120 A qualitative co-design methodology and a constructivist approach was used. This approach  
121 recognises how individuals' experiences are pivotal in shaping their knowledge and understandings  
122 of the world around them.<sup>25</sup> A Project Reference Group (PRG) guided all aspects of the research. The  
123 PRG was comprised of stakeholders including local and international Pacific community members,  
124 health professionals, and Victorian Government policy advisors. The PRG met twice, once prior to  
125 data collection to advise on study scope, aims and methodology, and once afterwards to help  
126 contextualise findings and advise on recommendations. The chairperson ensured that local Pacific  
127 community members' voices were given priority in meetings. Ethics approval was provided by the  
128 Royal Children's Hospital Research Ethics Committee (#91200).

129

### 130 ***Participant eligibility and recruitment***

131 Patients with Pacific ethnic backgrounds who resided in Victoria and had attended an ARF/RHD  
132 outpatient clinic at The Royal Children's Hospital, Melbourne (RCH) since 1 June 2019 were identified  
133 through reviewing RCH records by a paediatrician who was associated with the clinics. Their  
134 caregiver was eligible to participate in a qualitative interview, as were patients aged  $\geq 10$  years old.  
135 Patients aged  $\geq 15$  years old were also eligible to participate in the youth focus group. In addition,  
136 general practitioners (GPs) who treated eligible patients were invited to be interviewed, as were  
137 other stakeholders who worked with eligible ARF/RHD patients, or their data, with the aim of  
138 improving their health outcomes. All participants provided written informed consent. Patients aged  
139  $< 18$  years required written informed consent from a caregiver to participate.

140 The screening paediatrician phoned eligible patients aged  $\geq 18$  years or their caregiver if younger,  
141 briefly explained the study and requested permission to pass their contact information on to a  
142 researcher (LF). The researcher phoned those who agreed, discussed the study, obtained consent

143 and later conducted interviews. Recruitment of patients and caregivers ceased when the researchers  
144 perceived thematic saturation had occurred as informed by the TYMS Pacific Youth Wellbeing  
145 Framework.

146 Eligible GPs were identified from RCH medical records. Their practices were contacted up to two  
147 times by email, and once by phone, by a second researcher (JO) who invited the GP to participate.  
148 Other stakeholders were contacted directly following their identification by the research team  
149 and/or PRG. Recruitment of GPs ceased once attempts to contact all eligible people had been made.  
150 Recruitment of other stakeholders ceased when the researchers perceived sufficient information to  
151 contextualise patient and caregiver interview findings had been gathered.

## 152 ***Interviews***

153 Interviews followed semi-structured interview guides (Appendixes 1-3) and were audio recorded.  
154 Interview questions were tailored to participants' roles and experiences. Interview topics addressed  
155 patient and caregiver understandings of ARF and RHD, and for clinicians/other stakeholders,  
156 perceptions of how patients accessed and understood secondary prophylaxis. Interviews explored  
157 enablers and barriers to secondary prophylaxis, adherence and attending outpatient appointments.  
158 Potential ways to improve the delivery of clinical care were discussed, as were surveillance and  
159 health system gaps, particularly with stakeholders who worked in RHD prevention or control  
160 programs. Minor adaptations were made to the patient/caregiver interview guide following a review  
161 of the first two interview audios (by LF, JO, RT).

162 Patients and caregivers chose whether to be interviewed online via Zoom, by phone, or in-person at  
163 home or in a public space. They could be interviewed together or separately, and have other  
164 household members present as they wished. Patients and caregivers were interviewed by LF (*female,*  
165 *Samoan, clinical and research experience, Bachelor of Medicine and Bachelor of Surgery*) and were  
166 given the option of being interviewed in English or Samoan language. These interviews followed a  
167 Pacific conversational model of enquiry called 'talanoa'. Talanoa is ancient practice involving multi-

168 level and multi-layered critical discussions and free conversations without a rigid framework. Talanoa  
169 enables social conversations which may lead to critical discussion, producing knowledge and  
170 possibilities for addressing issues that affect Pacific people.<sup>26</sup> LF is experienced in conducting talanoa  
171 conversations. All other participants were interviewed in English online, one-on-one, by JO (*female,*  
172 *New Zealand European, qualitative research experience, PhD in public health*).

### 173 **Focus group**

174 We re-contacted eligible interviewed participants and invited them to participate in a youth focus  
175 group held over Zoom using a semi-structured interview guide (Appendix 4) with the audio recorded.  
176 LF introduced topics and chaired the session. JO observed and took notes.

177 Interview and focus group participants were offered a \$50 AUD gift card for their contribution.

### 178 **Transcription**

179 Audio files were transcribed with identifiers removed (transcripts were re-identifiable to the  
180 interviewers only). Participants were able to review and edit their interview transcript on request;  
181 three did so. Where participants were interviewed in Samoan, the interviewer produced a translated  
182 English-language transcript.

### 183 **Analysis**

184 We performed an initial inductive descriptive thematic analysis. After reviewing the transcripts, data  
185 were categorised into codes and sub-codes, then codes were grouped thematically using NVivo  
186 (v12). Two researchers (JO, LF) used a virtual whiteboard (miro.com) to identify common and unique  
187 themes and sub-themes, then refined and named themes. Themes were refined with advice from co-  
188 investigators and the PRG. Final themes were organised deductively within the TYMS Pacific Youth  
189 Wellbeing Framework (Figure 1).

190 Verbatim quotes are provided to support thematic analysis. Some quotes were modified slightly to  
191 assist readability.



192

193

## 194 **Results**

### 195 *Description of participants*

196 Twenty-seven participants were interviewed: nine patients and nine caregivers (all Samoan), a GP,  
197 three cardiologists, a paediatrician, a health policy advisor, an epidemiologist and two stakeholders  
198 with experience managing interstate RHD control programs. Seven caregivers were interviewed  
199 during the same interview session as the patient participant; one patient was interviewed but their  
200 caregiver did not participate; and one patient was interviewed at the same time as their two  
201 caregivers. The median patient participant age was 13 years; range 10-22 years. Three patients and  
202 four caregivers were interviewed in-person, all others were interviewed online via Zoom. Of the nine  
203 patient participants, six had ARF and three had required cardiac surgery for RHD. All patients  
204 reported receiving regular BPG injections except one who had switched to using oral antibiotics. All  
205 patient participants granted the researchers permission to access their RCH medical record. The  
206 researcher was unable to contact two of ten caregivers who consented to being contacted. Sixteen of  
207 17 GPs did not respond to the email invitation, nor did three other stakeholders.

208 Interviews ranged from 24 to 71 minutes. The average interview duration was 48 minutes for  
209 patient-caregiver sessions, and 41 minutes for others. No patient/caregivers were previously known  
210 to LF. Six stakeholder participants were known to JO through their professional roles. Three  
211 caregivers were interviewed in Samoan. All other interviews were in English. Three interviewed  
212 patients were eligible and were invited to take part in the youth focus group, two of whom attended  
213 (both were male). The online focus group ran for 52 minutes.

214 **Key themes**

215 ***Wanting to know more about an upsetting topic (corresponding TYMS Framework***  
216 ***domains: cognitive, and social relationships)***

217 Patients and caregivers did not describe themselves as RHD experts, saying they did not feel they  
218 knew much about ARF/RHD, but expressed a strong desire to learn more. Despite this, some went on  
219 to provide accurate descriptions of the causal pathway. The need for secondary prophylaxis was  
220 unanimously accepted, with most patients and caregivers linking regular secondary prophylaxis with  
221 preventing cardiac damage, and/or staying well. Participants shared questions about their secondary  
222 prophylaxis duration and how ARF/RHD affected their health. Young adult patients, in particular,  
223 wanted to know more about their condition and ways to be healthy. A desire for information to  
224 inform healthy eating and exercise schedules was expressed. Some patients discussed their  
225 perception that ARF had weakened them and wanted to recover their strength.

226 *'It [ARF] makes you weak, makes you change who you are. It's like a very sad thing to have because it doesn't*  
227 *make you reach your full potential.'* Patient #1

228 Patients often said they did not like to dwell on ARF/RHD because they felt sad thinking about it and  
229 had unpleasant memories of being very unwell. Several caregivers had prior knowledge of ARF from  
230 a diagnosis in their family. Several others described being surprised to learn they had affected family  
231 members after their child was diagnosed, and wished that they had known about interventions to  
232 prevent transmission before their child became unwell. Participants discussed sharing little, if  
233 anything, about having ARF/RHD with anyone outside of their family and healthcare providers,  
234 feeling that others would not be able to relate. Many said they wanted to meet others who had been  
235 affected by ARF/RHD to learn from them and seek reassurance. Several caregivers enquired about a  
236 support group.

237 *'...just going back to the community support groups. ... it's a bit hard to talk about it because she [patient]*  
238 *doesn't understand [ARF]. Maybe if there are other people on this journey that did understand... [she could] see*  
239 *what they're doing to help make themselves better.'* Caregiver #1

240 ***Improve clinicians' understanding of RHD in Victoria (corresponding TYMS***  
241 ***Framework domains: physical health and mental health)***

242 A strong desire to support clinicians to increase their awareness of ARF/RHD and which groups are  
243 at-risk in Victoria was expressed. While some participants had been diagnosed correctly and treated  
244 at their initial presentation, others reported the ARF/RHD diagnosis being missed repeatedly by GPs  
245 and hospital emergency department staff, while experiencing distressing symptoms. These  
246 experiences were traumatic for patients and families. Affected participants shared their outrage and  
247 frustration, with caregivers remembering feeling distressed at having to insist that their child be  
248 thoroughly and repeatedly assessed by healthcare providers. Many said they felt let down by medical  
249 staff.

250 *"...Why am I even listening to this person [ED doctor] saying he's okay to go to school? ...As a mother, my mind*  
251 *was already distraught, it was already shocked, it was already overwhelmed with what I was having to go*  
252 *through... I couldn't breathe properly. They [my GP] put it down to anxiety from trauma [from a repeatedly*  
253 *missed RHD diagnosis]..."* Caregiver #2

254 In some cases, the child's condition had deteriorated by the time the correct diagnosis was made,  
255 leading to a loss of trust in healthcare providers.

256 *"When I complained about the GP, he said, "I'm really sorry about your case, but it's just doctors over here are*  
257 *not familiar with rheumatic disease," and that's pretty much where the problem is. ...if they'd found it out early,*  
258 *his heart wouldn't be [damaged]... and if we kept listening to the doctor, we would've lost him. They said it was*  
259 *almost too late."* Caregiver #3

260 After the ARF/RHD diagnosis, caregivers sometimes described their frustration from challenging GPs'  
261 patient management, and insisting the patient/their siblings undergo a throat swab when presenting

262 to primary care with pharyngitis, and receive antibiotics if *S. pyogenes* is detected. Two participants  
263 described separate occasions where a highly adherent patient was discovered to have been receiving  
264 short-acting benzylpenicillin injections in error over multiple years, when they should have been  
265 receiving BPG.

266 Other stakeholders, including clinicians, agreed there was a need for greater awareness of ARF/RHD  
267 among GPs and ED staff in areas of Victoria where high-risk populations are clustered. Supporting  
268 clinicians to understand key topics was emphasised, in particular ARF/RHD symptoms, primary and  
269 secondary prevention, and which children are at highest risk.

270

271 ***Pacific patients need more support to receive care (corresponding TYMS Framework***  
272 ***domains: environment, resources)***

273 Most participants were aware that Pacific people were at higher risk of ARF but lacked confidence in  
274 the Victorian healthcare system's capacity to detect cases (except at RCH), and facilitate ongoing case  
275 management. A lack of coordination between treating physicians and restrictions around sharing  
276 medical records were identified as barriers to patients transitioning from paediatric to adult care  
277 systems without being lost to follow up, and as barriers to primary and tertiary healthcare providers  
278 liaising effectively. Several interviewed clinicians suggested that ensuring patients' GPs were highly  
279 engaged in their treatment. They also postulated that continuing to involve family members in the  
280 patient's care as they transitioned into the adult care system could reduce loss to follow up, and  
281 improve the quality of care. Some patients and caregivers described feeling burdened having to  
282 explain their medical history repeatedly to treating clinicians.

283

284 *"I was overwhelmed starting to think all this took so long because I wasn't recalling everything. I ended up*  
285 *documenting in a book what actually had happened, just so it was easier if they had asked me again, what*  
286 *were signs that were happening, symptoms."* Caregiver #2

287

288 Participants who had immigrated to Australia discussed their confusion around how to obtain  
289 secondary prophylaxis in Victoria and obtain medical treatment more generally. They shared  
290 concerns around the cost of care, particularly expenses associated with purchasing BPG and hospital  
291 parking. Participants reported paying differing amounts for BPG. While all said they would prioritise  
292 finding the money, many were concerned the cost of BPG would increase.

293

294 *“There is not much support to help us. Even finding ways to make ends meet for our children, maybe there*  
295 *should be some sort of support like vouchers for families.” Caregiver #4*

296 One young adult patient discussed a belief that they would need to find a job to afford their  
297 secondary prophylaxis.

298 *“When found out the medication costs money, I was like, “Oh, damn! That sucks.” ...I'm going to have to get a*  
299 *job, a form of transport too. I guess it's going to be hard to do that.” Patient #4*

300 ***Patients will always have family support (corresponding TYMS Framework domains:***  
301 ***family and culture)***

302 Patients identified family as their primary source of support and security. Caregivers described their  
303 extended family providing support to manage their child's health. Despite often managing busy  
304 households with many children, caregivers were highly invested in their child's diagnosis and  
305 treatment, and all identified getting secondary prophylaxis on time as a top priority. Participants  
306 were confident about their ability to stay up-to-date with BPG injections. Most reported never  
307 missing an injection although a few caregivers shared feelings of guilt at having missed a single  
308 injection.

309 *“There was one missed injection during lockdown. ...I completely forgot and I felt so bad about it. We have*  
310 *never missed an injection since.” Caregiver #5*

311 Older patients and caregivers discussed patients taking on more responsibility for their treatment as  
312 they approached adulthood. Such responsibilities included organising and attending appointments  
313 alone, paying for BPG and having conversations with clinicians. Despite this, caregivers said they  
314 would always be there to support their child to receive the treatment they need.

315 *“For us, with our community and being an Islander, that age [18 years] means nothing. That support will*  
316 *always be there. Either me or my sister will continue ...to take him to his appointments [to have BPG injected].”*

317 *Caregiver #6*

318 Patients were largely confident about taking on more responsibility, knowing that they could always  
319 look to their family for assistance. Most patients described feeling apprehensive visiting hospitals,  
320 especially by themselves, but mentioned that they liked their hospital-based physicians and GP  
321 providers. The oldest patient shared how he missed, and is now putting off, his first appointment  
322 with an adult cardiology specialist, but intends to re-book because his parents would want him to  
323 attend.

324 *“... it’s my responsibility to take care of myself and drive myself there. I sort of have flashbacks of when I was in*  
325 *the hospital and I don’t really like that feeling. ...it doesn’t really motivate me to go. ...but if I was to tell them*  
326 *[my parents] that I haven’t been to the doctor’s to get a check-up, they definitely won’t be happy. So, I definitely*  
327 *have to call back.” Patient #2*

328

329 ***Inconvenience and injection pain is worth it (corresponding TYMS Framework***  
330 ***domains: physical health, mental health)***

331 Patients and caregivers were strongly motivated to receive all the recommended BPG injections, but  
332 injection pain was the first thing they all wanted to change about treatment delivery. Severe injection  
333 pain during, and following, BPG administration was described. Patients expressed confidence in their  
334 ability to tolerate the injection. Caregivers shared feeling distressed watching their child receive the  
335 injection. Patients described a range of techniques to get through injection administration, such as

336 distractions, numbing the skin first with aesthetic cream or ice, and having something to look  
337 forward to afterwards. Most said they wanted to rest afterwards and avoid putting weight on the  
338 injected area due to soreness.

339 *“After, I go eat at a fast food restaurant. [laughs] That’s my treat. I put a pillow on it [injection site],*  
340 *and I sleep on the side where it doesn’t hurt.” Patient #3*

341 Some participants described lignocaine being added to BPG, saying this helped a lot but the area still  
342 hurt afterwards. A range of injection sites were described (including the upper arm), with variable  
343 administration speeds and inconsistent bruising. One participant had switched to twice daily oral  
344 antibiotics due to a needle phobia, and discussed difficulty remembering to take the pills. A strong  
345 desire for more convenient and less painful secondary prophylaxis was expressed, including by  
346 having injections at home, or requiring secondary prophylaxis less frequently or over a shorter  
347 timeframe.

348 Patients and caregivers described their motivations to receive BPG, saying they wanted to avoid the  
349 unpleasant symptoms which had triggered the ARF/RHD hospitalisation and hoping to avoid cardiac  
350 damage. Caregivers of ARF patients often expressed relief their child was receiving BPG and hope  
351 that they would avoid lasting heart damage.

352 *“I get monthly injections now. I don’t mind getting them. They’re sort of just there. If I don’t want to end up like*  
353 *I did in 2018 [undergoing heart surgery], then I might as well just keep taking the injection.” Patient #4*

354 Inconvenience having to organise and remember clinic appointments for BPG was widely discussed,  
355 although treating clinics regularly sent reminders.

356 *“Yes, its expensive [BPG], but we pay it because it’s for our children [two of whom have ARF]. ...we take turns*  
357 *taking our children to their appointments. We make sure one of us is available. We take a day off from work if*  
358 *the appointment times are early in the mornings.” Caregiver #1*



359 Patients and caregivers agreed that an online app with information about RHD and capacity to help  
360 them keep track of appointments would be useful, particularly if it could include specialist  
361 appointments.

362 ***Trusted GPs are treasured (corresponding TYMS Framework domain: relationships)***

363 Close relationships with GPs were enjoyed by some participants. Clinicians who took the time to  
364 demonstrate their understanding of the patient's condition and build rapport were highly valued.  
365 This was particularly so following a loss of trust in healthcare providers after the ARF/RHD diagnosis  
366 had been repeatedly missed at first. Caregivers described relief at finding a primary care provider  
367 who they felt was competent to treat their child.

368 *"Thank God we found this doctor. ...He knows exactly what the kids go through, especially with this type of*  
369 *condition." Caregiver #3*

370 Caregivers shared their willingness to travel to a non-local clinic to have BPG administered by their  
371 preferred provider and would follow their provider if they moved to a new practice.

372 *"After {patient} was diagnosed, we changed our GP. ....he looks after [patient] well, and we trust him. So, that's*  
373 *the reason why we travel all the way there. Caregiver #7*

374 Even when patients had trusted relationships with healthcare providers, many said they felt too shy  
375 to ask them questions. Interviewed clinicians described feeling uncertain of how well their patients  
376 understood ARF/RHD, and discussed the importance of building rapport with families within a fast-  
377 paced and impersonal medical setting. Older patients discussed wanting to overcome shyness and  
378 have two-way conversations with healthcare providers, with caregivers wanting to support this.

379 *"It was always me having to do the talking ...but now that he is [older] we got told he would transition to the*  
380 *adult clinic... Now we have to really get him to start talking!" Caregiver #2.*

381

## 382 Discussion

383 A clear need to improve the delivery of clinical and public health services for people living with ARF  
384 and RHD in Victoria was apparent. Ensuring high adherence to secondary prophylaxis over many  
385 years is challenging and requires an understanding of local factors that affect high-risk groups.<sup>27,28</sup>  
386 Key barriers to receiving treatment and monitoring which we identified included financial costs,  
387 inconvenience of attending appointments, limited clinical awareness of ARF/RHD, and patients  
388 feeling unable to have two-way conversations with healthcare providers. Identification of these  
389 barriers has, in turn, enabled us to identify potential solutions and make recommendations to  
390 improve the delivery of clinical care (Table). Introducing an RHD register to Victoria which is  
391 supported by a specialist RHD nurse could help to overcome many of these barriers. A well-resourced  
392 register would enable patients to maintain their continuity of care when moving between healthcare  
393 providers, and routinely collected data could facilitate future assessments of the effectiveness of BPG  
394 delivery.<sup>7,29,30</sup> In addition, a list of clinics that provide BPG could be made publicly available as a  
395 patient resource. Removing the costs of purchasing BPG currently borne by patients and their  
396 families would enhance the accessibility of secondary prophylaxis. A positive relationship between  
397 patients, caregivers and healthcare providers is well-established as a determinant of BPG adherence  
398 in other Australian jurisdictions and overseas.<sup>31-33</sup> Continuity of patient care could be supported by  
399 funding a specialist RHD nurse who is capable of answering clinical questions. Given the relatively  
400 small number of patients receiving RHD prophylaxis<sup>10</sup>, one nurse could potentially serve the entire  
401 Victorian patient population. The nurse may have a dual responsibility to support treating clinicians  
402 to provide best practice care. They could organise workshops and disseminate educational modules  
403 that increase clinical awareness of ARF and RHD. Increased clinical awareness may reduce the delays  
404 in diagnosis which a number of participants identified as contributing to poor health outcomes.

405 Building trust with a healthcare provider is an important aspect of chronic disease management.<sup>28</sup>  
406 Pacific people may tend to avoid seeking Western medical treatment unless they are seriously

407 unwell.<sup>18,20</sup> Experiencing racism, feeling stereotyped and judged in healthcare settings has been  
408 identified as a barrier to their health service uptake in Australia.<sup>13,19</sup> Pacific ARF/RHD patients having  
409 sensitive and engaged healthcare providers may help to overcome this, and help address feelings of  
410 shyness inhibiting two-way clinical conversations. Clinicians involving the family in patient care even  
411 once the patient reaches adulthood may be an acceptable way to support ongoing treatment and  
412 monitoring.<sup>28</sup> Evidence for this is demonstrated by interviewed caregivers expressing an intension to  
413 always support their child to receive treatment, and patients identifying family as their primary  
414 support. A high mental load from frequent clinic appointments was discussed by participants. This  
415 could be reduced, in part, if hospitals were to co-ordinate multiple outpatient clinics to take place on  
416 the same day (e.g. with an infectious disease physician and a cardiologist), and ensure that other  
417 relevant health staff (such as nutritionists) were also available.

418

419 Beyond acknowledging that local Pacific communities are over-represented in ARF, targeted  
420 prevention efforts are needed. Sharing Victorian-specific patient resources with patients moving into  
421 the state could help engage them with healthcare and promote secondary prophylaxis adherence. A  
422 support group may also be appreciated as a patient resource.<sup>31</sup> Many support groups for people with  
423 chronic health conditions exist in Victoria and provide opportunities for members to learn about  
424 their condition, share experiences and socialise.<sup>34</sup> For example, Heartbeat Victoria Council Inc. is a  
425 not-for-profit organisation which hosts a number of regional support groups for people with heart  
426 conditions.<sup>35</sup>

427 Selection bias in our study is likely because people who were engaged in healthcare attended the  
428 RCH clinic and were willing to be interviewed. Clinic appointments provides an opportunity to link  
429 patients with prophylaxis and educate them about their condition. Perspectives of people who were  
430 unwilling or unable to attend their clinic appointment were missed by our study. This may have  
431 accounted for the high BPG adherence reported, as may response bias when speaking with the

432 interviewer. Furthermore, people who were contactable by both the screening clinician and the  
433 researcher may have had stable living situations, which may relate to experiencing less  
434 socioeconomic disadvantage than others. Despite this, concerns around the cost of treatment and  
435 missed BPG doses were discussed, indicating that participants were comfortable sharing with the  
436 interviewer. Employing an ethically-matched interviewer who was fluent in Samoan and possessed a  
437 deep understanding of Samoan cultural practices, including talanoa, was a key strength of our study.  
438 Such strengths could be translated to the RHD control program if a specialist RHD nurse who  
439 possessed these qualities was employed. Our interviewer's experience working in healthcare in  
440 Samoa likely assisted in putting participants at ease when discussing personal and emotionally  
441 difficult topics. Employing ethnically-matched interviewers is thought help to create a culturally safe  
442 interview environment that improves the experience for the participant and the quality of  
443 information they provide.<sup>36</sup>

444

445 While people of all Pacific ethnicities were able to participate, interviewed patients and caregivers all  
446 had Samoan backgrounds. The study findings may therefore not be extrapolatable to other patient  
447 groups. Most domains of the TYMS Framework were reflected in our interviews, indicating this  
448 framework was appropriate for this study. Participants described their family as their support base,  
449 as the model indicates, and cultural expectations around youth gaining responsibility and  
450 independence were discussed. While the TMYS domain includes spirituality as a pillar of youth  
451 wellbeing, this aspect was not generally mentioned by participants - beyond expressing gratitude  
452 that the RHD experience had not been any worse.

453

454 There was a very poor response rate among invited GPs (17/18 did not respond), despite three  
455 invitations to participate. This likely reflects the busy Victorian primary healthcare setting, and  
456 possibly a lack of engagement with RHD. A study of young Pacific mothers in Victoria noted that  
457 contemporary healthcare models made it difficult for them to develop trusted relationships with

458 healthcare providers.<sup>19</sup> These participants suggested that models of care that were effective in New  
459 Zealand should be replicated in Australia. Notably this included providing Pacific health workers,  
460 outreach services and greater service intergration.<sup>19,22</sup> These findings also hold relevance to Pacific  
461 families with ARF/RHD in Victoria, who frequently mentioned preferring to receive BPG at home.<sup>31,33</sup>  
462  
463 Recommendations for changes to Victorian health policies, systems and practices are made below  
464 based on our findings (Table 1).

465

466 **Table 1. Recommendations for improving Victorian health policies, systems and clinical**  
467 **practice for Pacific children and young people living with acute rheumatic fever and**  
468 **rheumatic heart disease**

|                                                                                                                                                                                                                                                                                                                                                                                                                                                                 |
|-----------------------------------------------------------------------------------------------------------------------------------------------------------------------------------------------------------------------------------------------------------------------------------------------------------------------------------------------------------------------------------------------------------------------------------------------------------------|
| <b><i>Theme: Wanting to know more about an upsetting / topic</i></b>                                                                                                                                                                                                                                                                                                                                                                                            |
| <b>Create Victoria-specific patient resources</b> <ul style="list-style-type: none"><li>• Ensure resources are culturally appropriate for, and tailored to, the Victorian patient population.</li><li>• Help people understand ARF, RHD and case management in Victoria.</li><li>• Make resources easily obtainable for patients coming into Victoria.</li><li>• Provide Victorian patients with links to the RHD Australia Champions4Change program.</li></ul> |
| <b>Create and maintain a support group for patients and families</b> <ul style="list-style-type: none"><li>• This could be hosted through a not-for-profit stakeholder organisation and may be independent from clinicians.</li><li>• The support group does not necessarily need to be Victoria-specific.</li></ul>                                                                                                                                            |
| <b><i>Theme: Pacific patients need more support to receive care</i></b>                                                                                                                                                                                                                                                                                                                                                                                         |

### **Implement a Victorian patient register to support best practice management**

- Permit rapid record sharing between healthcare providers.
- Enhance patients' continuity of care.
- Enable a list of clinics that provide BPG to be made publicly available.
- Include cardiac status which clinicians may view, and edit.
- Automate data collection wherever practical.

### **Introduce a specialist Victorian RHD nurse**

- This nurse could liaise with treating clinicians and support them to provide best-practice patient care.
- By building close relationships with patients and families, the nurse could help answer clinical questions, and facilitate the patient journey.

### **Support GPs and ED staff in areas where Pacific and other high-risk groups are concentrated to increase their awareness of ARF and RHD and high risk groups**

- Develop continuing education modules.
- Awareness raising could be supported by a RHD nurse and not-for-profit stakeholders.

### **Enhance RHD prevention measures**

- Promote ARF awareness and prevention in at-risk Victorian communities through culturally appropriate community-led interventions.
- Support migrants to obtain affordable healthcare.
- Encourage community members to talk about ARF.
- Ensure Pacific leadership and representation occurs across all aspects of Victorian RHD control.

***Theme: Injection pain is worth it***

**Make getting BPG simple and free of charge**

- Reduce confusion around costs, investigate and remove costs to consumers.
- Ideally enable flexible BPG delivery at home.
- Support development of technologies that make secondary prophylaxis more convenient and less painful.

***Theme: Trusted GPs are treasured***

**Maintain close clinical involvement in patient care**

- GPs should be involved in patient care - even if not administering BPG personally.
- With support from a specialist RHD nurse, GPs should maintain links with family who may help re-engage youth in healthcare if necessary.
- Clinicians can link patients to other health and support services, e.g. if moving to a new area – ideally through a register.
- Increase the frequency that adolescent patients are seen by managing GPs and specialists when they are transitioning to the adult care system.
- Implement multidisciplinary hospital clinics which allow patients to see their cardiologist, physician and other relevant staff during a single trip.

469

470 **Conclusion**

471 Unlike in northern Australia, around half of the patients presenting with ARF in Victoria have Pacific  
472 ethnic backgrounds. There are clear opportunities to improve the delivery of clinical care and public  
473 health management for people living with ARF/RHD in Victoria, particularly by increasing Pacific  
474 leadership and stakeholder representation. Introducing a patient register and a specialist RHD nurse  
475 to support best practice patient management may help to improve the continuity of care.  
476 Supporting clinicians who work with at-risk populations to increase their awareness of ARF/RHD

477 should also be a key focus, as well as creating and disseminating patient resources that are specific  
478 to the unique Victorian patient population. There is potential to help address the marginalisation of  
479 Victorian Pacific communities by putting patients' and their families' needs at the forefront of new  
480 policies to improve health outcomes.

481

482

## 483 REFERENCES

484

- 485 1. Carapetis JR, Steer AC, Mulholland EK, Weber M. The global burden of group A streptococcal  
486 diseases. *The Lancet Infectious Diseases* 2005; 5(11): 685-94.
- 487 2. Watkins DA, Johnson CO, Colquhoun SM, et al. Global, regional, and national burden of  
488 rheumatic heart disease, 1990–2015. *New England Journal of Medicine* 2017; 377(8): 713-22.
- 489 3. Gordis L. The virtual disappearance of rheumatic fever in the United States: lessons in the  
490 rise and fall of disease. T. Duckett Jones memorial lecture. *Circulation* 1985; 72(6): 1155-62.
- 491 4. Ralph AP, Carapetis JR. Group A streptococcal diseases and their global burden. *Host-*  
492 *Pathogen Interactions in Streptococcal Diseases*: Springer; 2013: 1-27.
- 493 5. RHD Australia (ARF/RHD writing group). The 2020 Australian guideline for prevention,  
494 diagnosis and management of acute rheumatic fever and rheumatic heart disease (3.2 edition,  
495 March 2022), 2020.
- 496 6. World Health Organization. Rheumatic fever and rheumatic heart disease. Report by the  
497 Director-General. 12 Apr 2018. Available from:  
498 [http://apps.who.int/gb/ebwha/pdf\\_files/WHA71/A71\\_25-en.pdf](http://apps.who.int/gb/ebwha/pdf_files/WHA71/A71_25-en.pdf) (accessed 4 Apr 2019).
- 499 7. Ralph AP, Fittock M, Schultz R, et al. Improvement in rheumatic fever and rheumatic heart  
500 disease management and prevention using a health centre-based continuous quality improvement  
501 approach. *BMC health services research* 2013; 13(1): 1-13.



- 502 8. Australian Institute of Health and Welfare. Acute rheumatic fever and rheumatic heart  
503 disease—in brief. Cat. no. CVD 87. Canberra, Australia, 2019.
- 504 9. Australian Bureau of Statistics. 2016 New South Wales, Census All persons QuickStats. 2022.  
505 Available from: [https://www.abs.gov.au/census/find-census-](https://www.abs.gov.au/census/find-census-data/quickstats/2016/1#:~:text=In%20the%202016%20Census%2C%20there,up%202.9%25%20of%20the%20population.&text=The%20median%20age%20of%20people%20in%20New%20South%20Wales%20was%2038%20years)  
506 [data/quickstats/2016/1#:~:text=In%20the%202016%20Census%2C%20there,up%202.9%25%20of%20the%20population.&text=The%20median%20age%20of%20people%20in%20New%20South%20Wales%20was%2038%20years](https://www.abs.gov.au/census/find-census-data/quickstats/2016/1#:~:text=In%20the%202016%20Census%2C%20there,up%202.9%25%20of%20the%20population.&text=The%20median%20age%20of%20people%20in%20New%20South%20Wales%20was%2038%20years) (accessed 20 Sep 2023).
- 509 10. Lindholm DE, Whiteman IJ, Oliver J, et al. Acute rheumatic fever and rheumatic heart disease  
510 in children and adolescents in Victoria, Australia. *Journal of Paediatrics and Child Health* 2023; 59(2):  
511 352-9.
- 512 11. The City of Greater Dandenong, Victorian Government. A Brief Statistical Profile of Pacific  
513 Islanders in Victoria. Available from:  
514 [https://www.greaterdandenong.vic.gov.au/\\_flysystem/filerepo/A6819577](https://www.greaterdandenong.vic.gov.au/_flysystem/filerepo/A6819577) (accessed 23 Aug 2022).
- 515 12. South East Local Learning and Employment Network. The Māori and Pasifika Young People of  
516 the South East Region of Melbourne. Dec 2012. Available from: [https://sellen.org.au/wp-](https://sellen.org.au/wp-content/uploads/2020/06/Maori_and_Pasifika_Young_People_of_the_South_East-1.pdf)  
517 [content/uploads/2020/06/Maori\\_and\\_Pasifika\\_Young\\_People\\_of\\_the\\_South\\_East-1.pdf](https://sellen.org.au/wp-content/uploads/2020/06/Maori_and_Pasifika_Young_People_of_the_South_East-1.pdf) (accessed  
518 23 Aug 2022).
- 519 13. Razi S. The Pasifika Project. A mixed-methods clinic supporting the Pasifika Community in the  
520 Western suburbs of Melbourne. 2020. Availale from:  
521 [https://westjustice.org.au/cms\\_uploads/docs/pasifika-report--final.pdf](https://westjustice.org.au/cms_uploads/docs/pasifika-report--final.pdf) (accessed 25 Aug 2022).
- 522 14. Savaii KP. Pacific youth "romantic" relationships and wellbeing. Auckland, New Zealand:  
523 Auckland University of Technology; 2017.
- 524 15. Tuilaepa Youth Mentoring Service. Learning, reflection & evaluation. 2017. Available from:  
525 <http://www.tyms.org.nz/learning--evaluation.html> (accessed 6 Jul 2023).
- 526 16. Pulotu-Endermann K. Fonofale Model of Health. 1995. Available from:  
527 <https://hpfnz.org.nz/pacific-health-promotion/pacific-health-models> (accessed 1 Nov 2017).

- 528 17. Nishitani M, Lee H. The forgotten people in Australia's regional settlement policy are Pacific  
529 Islander residents. *The Conversation*. 27 May 2017.
- 530 18. Lee H, Nishitani M, Wickham D. Pacific Islanders in regional Victoria: Final project report. Sep  
531 2019. Available from: <https://doi.org/10.26181/5fa222a8a098e> (accessed 23 Aug 2022).
- 532 19. Moosad L, Ah Kuoi Y, Alexeyeff K, Paulsen I, Vaughan C. Invisible Mothers: young Pasifika  
533 women, health inequalities and negotiating wellbeing. Melbourne, Australia. Melbourne Social  
534 Equity Institute, University of Melbourne, 2022.
- 535 20. Ng Shiu R. The Place of Tuberculosis. The lived experience of Pacific peoples in Auckland and  
536 Samoa. Auckland, New Zealand: University of Auckland; 2006.
- 537 21. Brewer N, Foliaki S, Gray M, Potter JD, Douwes J. Pasifika women's knowledge and  
538 perceptions of cervical-cancer screening and the implementation of self-testing in Aotearoa New  
539 Zealand: A qualitative study. *The Lancet Regional Health: Western Pacific*. 2022; 28: 100551.
- 540 22. United Pacific Voice. Submission No. 509. Submission of the United Voice Of Pacific Island  
541 Communities On Behalf Of Pacific Island Communities In Victoria To The Joint Standing Committee  
542 On Migration On The Inquiry Into Multiculturalism In Australia. Melbourne, Australia, 2012.
- 543 23. Anderson A, Peat B, Ryland J, et al. Mismatches between health service delivery and  
544 community expectations in the provision of secondary prophylaxis for rheumatic fever in New  
545 Zealand. *Australian and New Zealand Journal of Public Health* 2019; 43(3): 294-9.
- 546 24. Tong A, Sainsbury P, Craig J. Consolidated criteria for reporting qualitative research (COREQ):  
547 a 32-item checklist for interviews and focus groups. *International Journal for Quality in Health Care*.  
548 2007; 19(6): 349-57.
- 549 25. Braun V, Clarke V. Chapter 4. Thematic Analysis. Washington, United States of America:  
550 American Psychological Association; 2012.
- 551 26. Vaioleti TM. Talanoa research methodology: A developing position on Pacific research.  
552 *Waikato Journal of Education* 2006; 12.

- 553 27. Engelman D, Ah Kee M, Mataika RL, et al. Secondary prevention for screening detected  
554 rheumatic heart disease: opportunities to improve adherence. *Transactions of The Royal Society of*  
555 *Tropical Medicine and Hygiene* 2017; 111(4): 154-62.
- 556 28. World Health Organization. Adherence to long term therapies. Evidence for action. Geneva,  
557 Switzerland, 2003.
- 558 29. Oliver J, Piers N, Baker MG. Improving rheumatic fever surveillance in New Zealand: results  
559 of a surveillance sector review. *BMC Public Health* 2014; 14(1): 528.
- 560 30. Moxon TA, Reed P, Jelleyman T, et al. Is a rheumatic fever register the best surveillance tool  
561 to evaluate rheumatic fever control in the Auckland region? *New Zealand Medical Journal*. 2017;  
562 130(1460): 48-62.
- 563 31. Wong L, Wong A, Maher L, et al. Co-design of youth appropriate services for young people  
564 with rheumatic fever/rheumatic heart disease in Counties Manukau District. *New Zealand Medical*  
565 *Journal*. 2023; 136(1585): 63-73.
- 566 32. Kevat P, Reeves B, Ruben A, Gunnarsson R. Adherence to Secondary Prophylaxis for Acute  
567 Rheumatic Fever and Rheumatic Heart Disease: A Systematic Review. *Current Cardiology Reviews*.  
568 2017; 13 (2): 155–66. Epub 2017/01/18.
- 569 33. Anderson A, Peat B, Ryland J, et al. Mismatches between health service delivery and  
570 community expectations in the provision of secondary prophylaxis for rheumatic fever in New  
571 Zealand. *Australian and New Zealand Journal of Public Health*. 2019. 43(3):294-299
- 572 34. BetterHealth Channel. Support groups. 2023. Available from:  
573 [https://www.betterhealth.vic.gov.au/health/servicesandsupport/finding-a-support-group#types-of-](https://www.betterhealth.vic.gov.au/health/servicesandsupport/finding-a-support-group#types-of-support-groups)  
574 [support-groups](https://www.betterhealth.vic.gov.au/health/servicesandsupport/finding-a-support-group#types-of-support-groups) (accessed 4 Dec 2023).
- 575 35. Heartbeat Victoria. My Heart My Health. 2023. Available from:  
576 <https://www.heartbeatvictoria.org.au/> (accessed 4 Dec 2023).

577 36. Athey KR, Coleman JE, Reitman AP, Tang J. Two experiments showing the effect of the  
578 interviewer's racial background on responses to questionnaires concerning racial issues. *Journal of*  
579 *Applied Psychology* 1960; 44(4): 244-6.

## 580 **Author contributions**

581 JO: Produced the study protocols and data collection instruments, collected, managed and analysed  
582 the data, interpreted findings and write up the manuscript.

583 LFL: Advised on the study methodology, data collection, interpreted findings.

584 AF: Advised on the study design and methodology, analysis and interpreted findings.

585 BJ: Advised on the study design, data collection and interpreted findings.

586 RT: Advised on the study design and methodology, analysis and interpreted findings.

587 DE: Conceptualised the study, advised on data collection, methodology and study scope, interpreted  
588 the findings.

589 KBG: Advised on data collection, methodology and study scope, interpreted the findings.

590 ACS: Conceptualised the study, advised on data collection, methodology and study scope,

591 interpreted the findings.

592 All authors critically reviewed successive versions of the draft manuscript.

593

## 594 **List of Figures**

595 Figure 1. The Tuilaepa Youth Mentoring Services Pacific Youth Wellbeing Framework

596

## 597 **Supporting Information**

598 Appendix 1. Interview guide – patients and caregivers

599 Appendix 2. Interview guide – clinicians

600 Appendix 3. Interview guide – other stakeholders

601 Appendix 4. Focus group guide

## 602 **Funding**

603 This study was funded through a Murdoch Children’s Research Institute Early Career Award made out

604 to JO. It was also funded by a National Health and Medical Research Council Investigator Grant made

605 to AS.

## 606 **Acknowledgments**

607 The researchers acknowledge the participants and project reference group members who gave their

608 time to this research. We also acknowledge Dr Jessica Kaufman (MCRI) who critically reviewed the

609 study protocol and advised on the study design.
